# Supplementary material for: Self-assembly of fluorescent carbon dots in a N,N-dimethylmethanamide solution via Schiff base reaction
Source: Royal Society of Chemistry journal article supplement (doi:10.1039/c4nr07119k), 2015-01-01
Supplement: c4nr07119k1.pdf [file c4nr07119k1.pdf]

## Supporting Information

### **Self-assembly of fluorescent carbon dots in N,N-dimethylmethanamide solution via Schiff base reaction**

Shengliang Hu\*, Yanli Ding, Qing Chang, Adrian Trinchi, Kui Lin\*, Jinlong Yang, Jun Liu

#### **Experimental section**

CDs were prepared by a hydrothermal approach as our described work<sup>16</sup>. In brief, 25 mL ethylene glycol was transferred into a polytetrafluorethylene (PTFE) (Teflon)-lined autoclave of 50 mL and was kept at 200 °C for 5 hours. After cooling to room temperature, the solution of CDs with oxygen-contained groups (O-CDs) was obtained. Then 10 mL of O-CDs without further treatment was mixed with 536 µL ethylenediamine by ultrasonic. The mixture was transferred into PTFE autoclave again and kept at 180 °C for 5 hours. Thus, CDs contained amine groups (N-CDs) were produced after cooling to room temperature. The obtained solution of N-CDs (0.5 mL) was mixed with 2.0 mL of N,N-dimethylmethanamide (DMF). The resulting mixture was stood at room temperature for 5 days and then some depositions were observed. After removing supernatant liquid, the carbon dot powders were obtained.

Transmission electron microscopy (TEM), high-resolution TEM (HRTEM) images and electron energy loss spectroscopy (EELS) were obtained using a FEI Tecnai G2 F20 microscope with a field-emission gun operating at 200 kV. Scanning electron microscope (SEM) and energy dispersive X-ray spectroscopy (EDS) were performed on a Hitachi S-4800 scanning electron microscope. Fluorescence spectra and absorption were collected on a Hitachi F4500 fluorescence spectrophotometer and a Shimadzu UV-2550 UV-vis spectrometer, respectively. The infrared spectra were obtained on a Thermo Nicolet 360 FT-IR spectrophotometer. XPS data of all samples was collected by a Kratos AXIS 165

mutitechnique electron spectrometer having an Al  $K_{\alpha}$  X-ray source for determining the composition and chemical bonding configurations.

## Other results

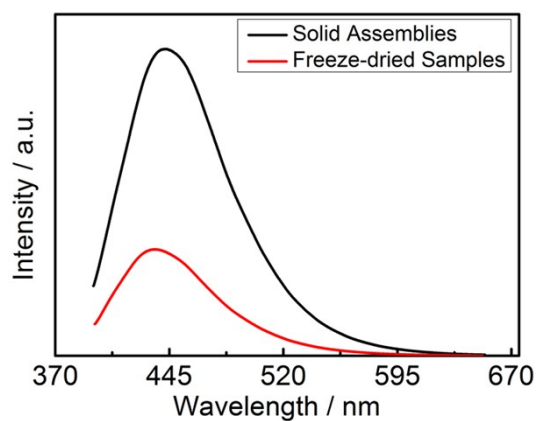

**Figure S1 PL comparasions between solid assembiles and freeze-dried powders of N-CDs.**

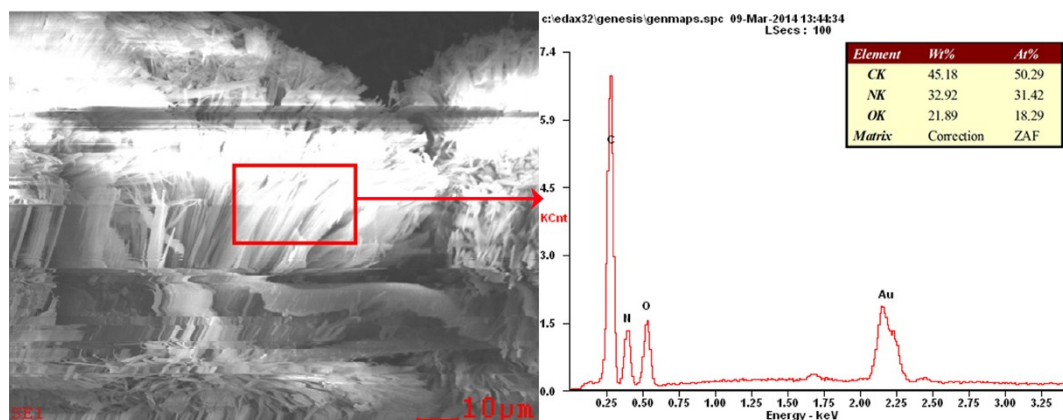

**Figure S2. EDS analysis of the precipitates**

**Table S1.** The effects of the volume ratios of  $V_{\text{N-CDs}} / V_{\text{DMF}}$  on the precipitate formation, where --- represents no precipitate formation after ten days.

|   | $V_{\text{N-CDs}} / \text{mL}$ | $V_{\text{DMF}} / \text{mL}$ | Precipitating time |
|---|--------------------------------|------------------------------|--------------------|
| 1 | 2                              | 0                            | ---                |
| 2 | 0                              | 2                            | ---                |
| 3 | 0.1                            | 2                            | <b>5 hours</b>     |
| 4 | 0.3                            | 2                            | <b>24 hours</b>    |
| 5 | 0.5                            | 2                            | <b>5 days</b>      |
| 6 | 1                              | 2                            | <b>7 days</b>      |
| 7 | <b>1.5</b>                     | <b>2</b>                     | ---                |

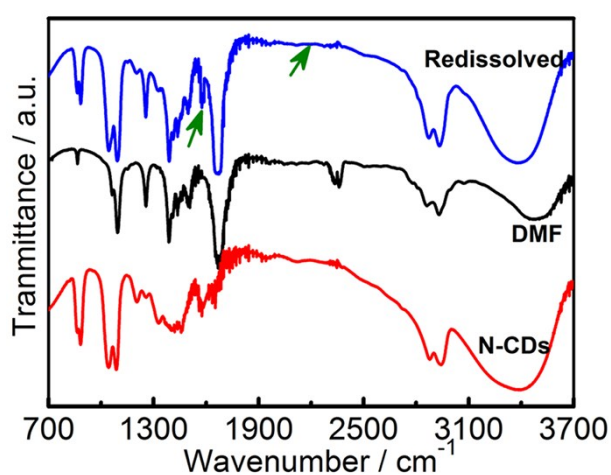

**Figure S3.** Comparisons of FTIR spectra of the re-dissolved precipitates, DMF and N-CDs

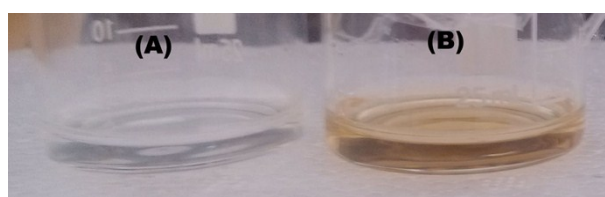

**Figure S4.** The photos of the blending solution of O-CDs and DMF (A), Cl-CDs and DMF (B), respectively.

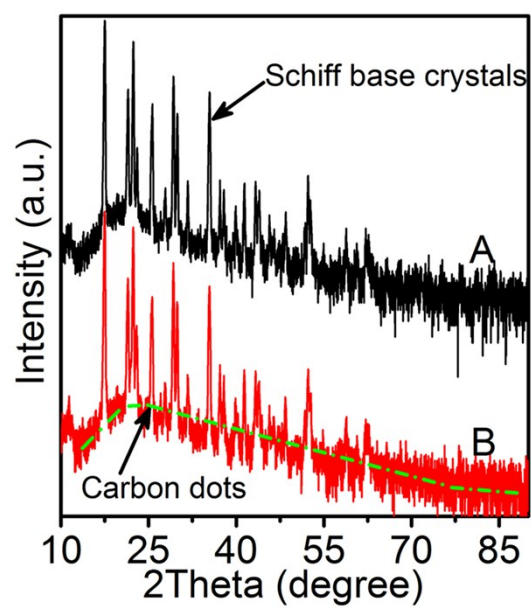

**Figure S5** XRD patterns of the solid assemblies (A) and ramified precipitates (B).
